# Supplementary material for: Bladder urothelium converts bacterial lipopolysaccharide information into neural signaling via an ATP-mediated pathway to enhance the micturition reflex for rapid defense
Source: PubMed Central journal article supplement (PMC7713076; doi:10.1038/s41598-020-78398-9), 2020-12-03
Supplement: 41598_2020_78398_MOESM1_ESM.pdf [file 41598_2020_78398_MOESM1_ESM.pdf]

# Supplementary Information

**Bladder urothelium converts bacterial lipopolysaccharide information into neural signaling via an ATP-mediated pathway to enhance the micturition reflex for rapid defense**

Norichika Ueda †, Makoto Kondo †\*, Kentaro Takezawa, Hiroshi Kiuchi, Yosuke Sekii, Yusuke Inagaki, Tetsuji Soda, Shinichiro Fukuhara, Kazutoshi Fujita, Motohide Uemura, Ryoichi Imamura, Yasushi Miyagawa, Norio Nonomura, Shoichi Shimada.

† These authors contributed equally to this work.

\* Corresponding author: Makoto Kondo

## Supplementary Figures and Legends

### Supplementary Figure S1

Pre-stimulation ATP concentration in the ATP release assay.

### Supplementary Figure S2

Intravesical LPS instillation increases the number of c-Fos-positive cells in the L6–S1 spinal cord.

### Supplementary Figure S3

Intravesical ATP treatment increases the number of c-Fos-positive cells in the L6–S1 spinal cord.

### Supplementary Figure S4

Schematic summary of hypothetical ATP signaling in bladder function.

## Supplementary Figure S1

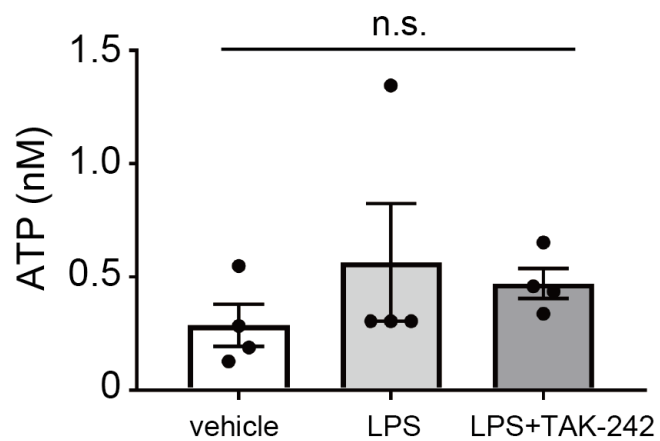

### Supplementary Figure S1

#### Pre-stimulation ATP concentration in the ATP release assay.

There were no significant differences in the pre-stimulation ATP concentration among groups ( $n = 4$  mice per group);  $p = 0.50$  (one-way ANOVA). Error bars represent s.e.m., n.s., not significant.

## Supplementary Figure S2

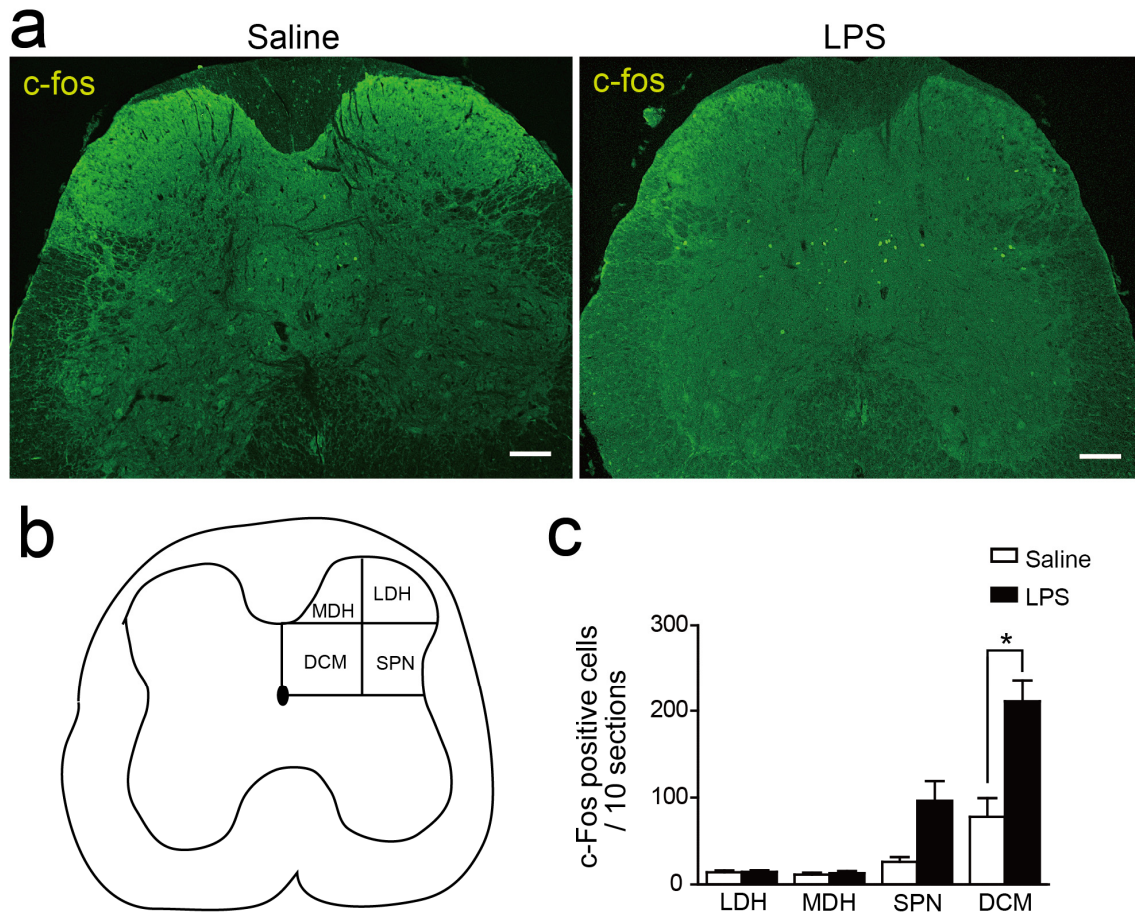

### Supplementary Figure S2

**Intravesical LPS instillation increases the number of c-Fos-positive cells in the L6–S1 spinal cord.**

(a) Immunohistochemical images of c-Fos expression in L6–S1 spinal cord following saline and LPS instillation. Scale bars, 100  $\mu\text{m}$ . (b) Schematic representation of four L6–S1 spinal cord regions; medial dorsal horn (MDH), lateral dorsal horn (LDH), dorsal commissure (DCM), and sacral parasympathetic nucleus (SPN). (c) The distribution of c-Fos-positive cells in the L6–S1 spinal cord induced by saline and LPS instillation ( $n = 4$  mice per group; 10 sections per mouse were assessed);  $*p = 0.028$  (Student's  $t$ -test with Holm correction). Error bars represent s.e.m.

## Supplementary Figure S3

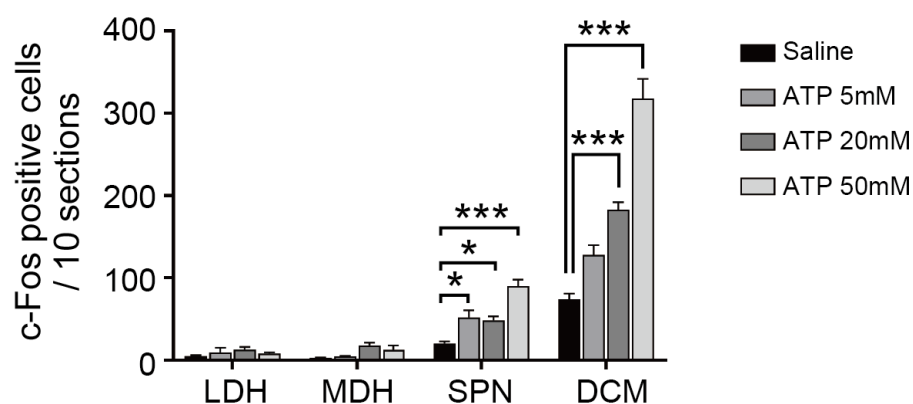

### Supplementary Figure S3

#### **Intravesical ATP treatment increases the number of c-Fos-positive cells in the L6–S1 spinal cord.**

The distribution of c-Fos-positive cells in the L6–S1 spinal cord following saline and ATP instillation in wild-type mice ( $n = 5$  mice per group; 10 sections per mouse were assessed); \*  $p < 0.05$ , \*\*\*  $p < 0.001$  (Tukey's test following one-way ANOVA). Error bars represent s.e.m.

## Supplementary Figure S4

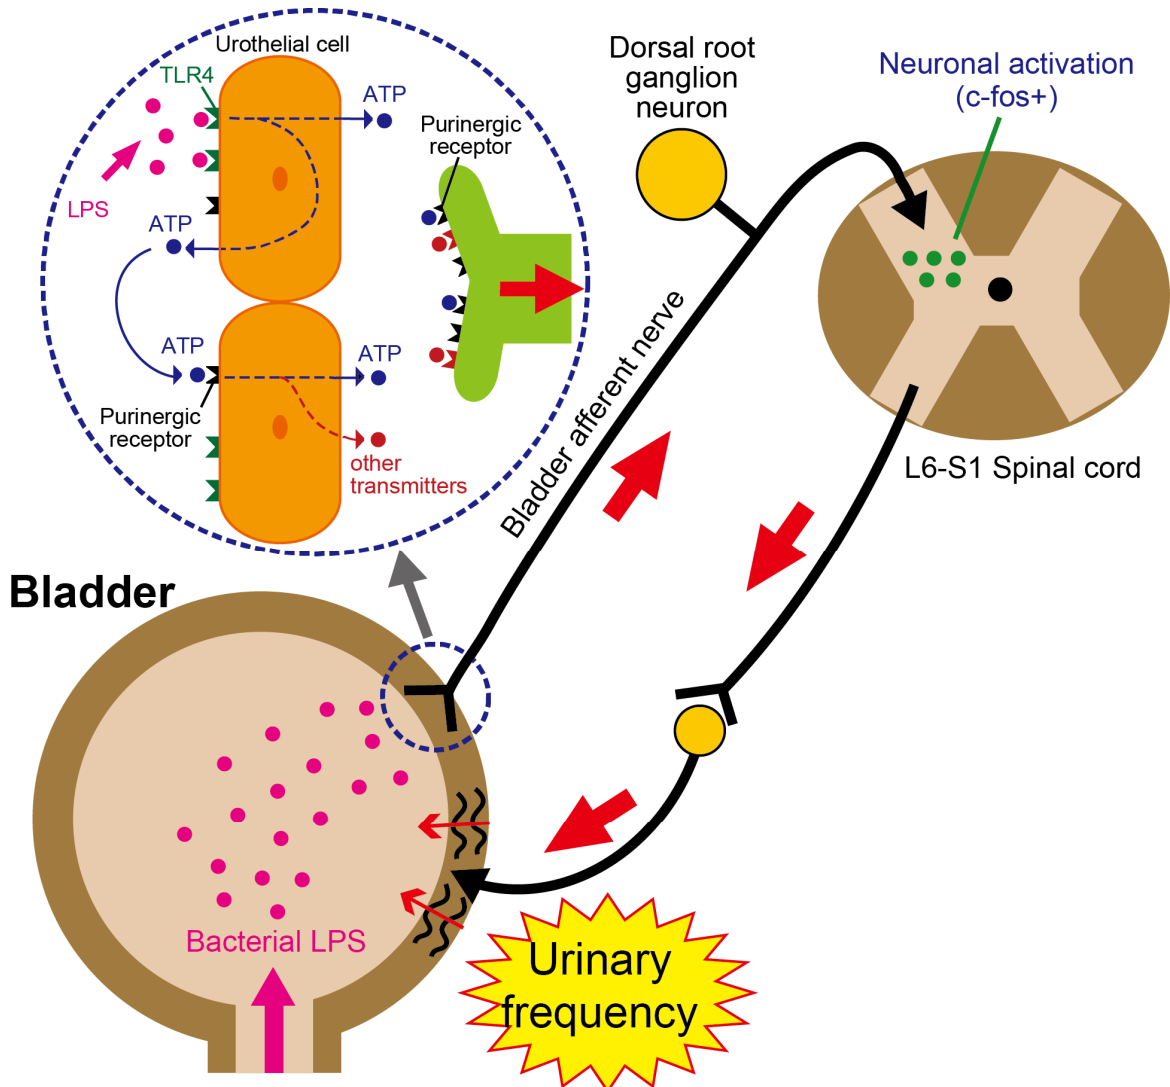

### Supplementary Figure S4

#### Schematic summary of hypothetical ATP signaling in bladder function.

Bladder urothelium senses luminal bacterial LPS through TLR4 and releases the transmitter ATP. ATP signaling plays a pivotal role in the LPS-induced activation of L6–S1 spinal neurons through bladder afferent nerves, resulting in urinary frequency.
